# Supplementary material for: Shared phylogeographic patterns between the ectocommensal flatworm Temnosewellia albata and its host, the endangered freshwater crayfish Euastacus robertsi
Source: PeerJ. 2014 Sep 25;2:e552. doi: 10.7717/peerj.552 (PMC4179389; doi:10.7717/peerj.552)
Supplement: Table S2 — 1 Ponniah & Hughes 2006 2 Shull et al., 2005 3 Hurry et al. 2014 (current publication) 4 Toon et al. 2009. [file peerj-02-552-s002.docx]

| | **Identification** | **Mountain** | **Stream** | **Haplotype ID & Genbank accession #** | | | --- | --- | --- | --- | --- | |  |  |  | **CO1** | **28S** | | clone robTH | Thornton Peak | Hilda Creek | AY324347**1** |  | | Euastacus fleckeri-clone fleckML | OUTGROUP- Mt Lewis | Leichhardt Ck | AY324348**1** |  | | Euastacus fleckeri-clone fleckMS | OUTGROUP | Unknown | AY324349**1** |  | | Euastacus fleckeri-KC2668 | OUTGROUP- Mt Lewis | Leichhardt Ck | DQ006336**1** |  | | FI1 | Mt Finnigan | Annan Ck | FI-A; DQ006368**2** |  | | FI10 | Mt Finnigan | Annan Ck | FI-A; DQ006368**2** | F1; EU920988**4** | | FI10J | Mt Finnigan | Annan Ck | FI-A; DQ006368**2** |  | | FI11 | Mt Finnigan | Annan Ck | FI-A; DQ006368**2** | F1; EU920988**4** | | FI11j | Mt Finnigan | Annan Ck | FI-A; DQ006368**2** |  | | FI12 | Mt Finnigan | Annan Ck | FI-A; DQ006368**2** |  | | FI13 | Mt Finnigan | Annan Ck | FI-A; DQ006368**2** |  | | FI13J | Mt Finnigan | Parrot Ck | FI-P; KJ939254**3** |  | | FI14 | Mt Finnigan | Annan Ck | FI-A; DQ006368**2** | F1; EU920988**4** | | FI14J | Mt Finnigan | Parrot Ck | FI-A; DQ006368**2** |  | | FI15 | Mt Finnigan | Parrot Ck | FI-A; DQ006368**2** |  | | FI16 | Mt Finnigan | Parrot Ck | FI-A; DQ006368**2** | F1; EU920988**4** | | FI17 | Mt Finnigan | Parrot Ck | FI-A; DQ006368**2** | F1; EU920988**4** | | FI18 | Mt Finnigan | Parrot Ck | FI-A; DQ006368**2** | F1; EU920988**4** | | FI19 | Mt Finnigan | Annan Ck | FI-A; DQ006368**2** | F1; EU920988**4** | | FI1j | Mt Finnigan | Parrot Ck | FI-A; DQ006368**2** |  | | FI2 | Mt Finnigan | Annan Ck | FI-A; DQ006368**2** |  | | FI2J | Mt Finnigan | Annan Ck | FI-A; DQ006368**2** |  | | FI3 | Mt Finnigan | Annan Ck | FI-A; DQ006368**2** |  | | FI3J | Mt Finnigan | Parrot Ck | FI-P; KJ939254**3** |  | | FI4 | Mt Finnigan | Annan Ck | FI-A; DQ006368**2** | F1; EU920988**4** | | FI5 | Mt Finnigan | Annan Ck | FI-A; DQ006368**2** |  | | FI5J | Mt Finnigan | Parrot Ck | FI-A; DQ006368**2** |  | | FI6 | Mt Finnigan | Annan Ck | FI-A; DQ006368**2** | F1; EU920988**4** | | FI7 | Mt Finnigan | Annan Ck | FI-A; DQ006368**2** |  | | FI7J | Mt Finnigan | Parrot Ck | FI-A; DQ006368**2** |  | | FI8 | Mt Finnigan | Annan Ck | FI-A; DQ006368**2** | F1; EU920988**4** | | KC2669 | Mt Finnigan | Parrot Ck | FI-A; DQ006368**2** |  | | KC2670 | Mt Finnigan | Horan’s Ck | FI-A; DQ006369**2** |  | | KC2674 | Thornton Peak | Hilda Creek | TP1; DQ006370**2** |  | | KC2737 | Mt Finnigan | Parrot Ck | FI-A; DQ006371**2** |  | | KC2738 | Mt Finnigan | Parrot Ck | FI-A; DQ006372**2** |  | | KC2776 | Mt Pieter Botte | R.Meg River | PB1; DQ006373**2** |  | | KC2777 | Mt Pieter Botte | R.Meg River | PB1; DQ006374**2** |  | | KC2778 | Thornton Peak | Hilda Creek | TP1; DQ006375**2** |  | | KC2779 | Thornton Peak | Hilda Creek | TP1; DQ006376**2** |  | | KC2780 | Mt Finnigan | Annan Ck | FI-A; DQ006377**2** |  | | KC2781 | Mt Finnigan | Annan Ck | FI-A; DQ006378**2** |  | | PB2 | Mt Pieter Botte | R.Meg River | PB1; DQ006373**2** |  | | PB1 | Mt Pieter Botte | R.Meg River | PB1; DQ006373**2** |  | | PB3 | Mt Pieter Botte | R.Meg River | PB1; DQ006373**3** |  | | PB37 | Mt Pieter Botte | R.Meg River |  | P1; KJ941016**3** | | PB38 | Mt Pieter Botte | R.Meg River |  | P1; KJ941016**3** | | PB39 | Mt Pieter Botte | R.Meg River |  | P1; KJ941016**3** | | PB4 | Mt Pieter Botte | R.Meg River | PB1; DQ006373**2** |  | | PB40 | Mt Pieter Botte | R.Meg River |  | P1; KJ941016**3** | | PB41 | Mt Pieter Botte | R.Meg River |  | P1; KJ941016**3** | | PB5 | Mt Pieter Botte | R.Meg River | PB1; DQ006373**2** |  | | PB6 | Mt Pieter Botte | R.Meg River | PB1; DQ006373**2** |  | | PB7 | Mt Pieter Botte | R.Meg River | PB1; DQ006373**2** |  | | RA cytochrome | Mt Finnigan | Annan Creek | FI-A; AY800362**1** |  | | RB cytochrome | Thornton Peak | Hilda Ck | TP3; AY800363**1** |  | | RC cytochrome | Mt Pieter Botte | R.Meg River | PB1; AY800364**1** |  | | robFIN | Mt Finnigan | Annan Creek | FI-A; AY324346**1** |  | | TP1 | Thornton Peak | Hilda Ck | TP1; DQ006370**2** |  | | TP2 | Thornton Peak | Hilda Ck | TP1; DQ006370**2** |  | | TP25 | Thornton Peak | Hilda Ck |  | T1; KJ941015**3** | | TP28 | Thornton Peak | Hilda Ck | TP1; DQ006370**2** | T1; KJ941015**3** | | TP29 | Thornton Peak | Hilda Ck |  | T1; KJ941015**3** | | TP3 | Thornton Peak | Hilda Ck | TP1; DQ006370**2** |  | | TP31 | Thornton Peak | Hilda Ck |  | T1; KJ941015**3** | | TP30 | Thornton Peak | Hilda Ck | TP2; KJ939253**3** | T1; KJ941015**3** | | TP32 | Thornton Peak | Hilda Ck | FI-A; DQ006368**2** | T2; KJ941017**3** | | TP33 | Thornton Peak | Hilda Ck | FI-A; DQ006368**2** | F1; EU920988**4** | | TP34 | Thornton Peak | Hilda Ck | FI-A; DQ006368**2** | F1; EU920988**4** | | TP36 | Thornton Peak | Hilda Ck |  | T1; KJ941015**3** | | TP4 | Thornton Peak | Hilda Ck | PB1; DQ006373**2** |  | | TP5 | Thornton Peak | Hilda Ck | TP3; AY800363**1** |  | | TP6 | Thornton Peak | Hilda Ck | TP3; AY800363**1** |  | | TP7 | Thornton Peak | Hilda Ck | TP3; AY800363**1** |  | | TP8 | Thornton Peak | Hilda Ck | TP3; AY800363**1** |  | | TP9 | Thornton Peak | Hilda Ck | TP3; AY800363**1** |  | |
| --- | --- | --- | --- | --- | --- | --- | --- | --- | --- | --- | --- | --- | --- | --- | --- | --- | --- | --- | --- | --- | --- | --- | --- | --- | --- | --- | --- | --- | --- | --- | --- | --- | --- | --- | --- | --- | --- | --- | --- | --- | --- | --- | --- | --- | --- | --- | --- | --- | --- | --- | --- | --- | --- | --- | --- | --- | --- | --- | --- | --- | --- | --- | --- | --- | --- | --- | --- | --- | --- | --- | --- | --- | --- | --- | --- | --- | --- | --- | --- | --- | --- | --- | --- | --- | --- | --- | --- | --- | --- | --- | --- | --- | --- | --- | --- | --- | --- | --- | --- | --- | --- | --- | --- | --- | --- | --- | --- | --- | --- | --- | --- | --- | --- | --- | --- | --- | --- | --- | --- | --- | --- | --- | --- | --- | --- | --- | --- | --- | --- | --- | --- | --- | --- | --- | --- | --- | --- | --- | --- | --- | --- | --- | --- | --- | --- | --- | --- | --- | --- | --- | --- | --- | --- | --- | --- | --- | --- | --- | --- | --- | --- | --- | --- | --- | --- | --- | --- | --- | --- | --- | --- | --- | --- | --- | --- | --- | --- | --- | --- | --- | --- | --- | --- | --- | --- | --- | --- | --- | --- | --- | --- | --- | --- | --- | --- | --- | --- | --- | --- | --- | --- | --- | --- | --- | --- | --- | --- | --- | --- | --- | --- | --- | --- | --- | --- | --- | --- | --- | --- | --- | --- | --- | --- | --- | --- | --- | --- | --- | --- | --- | --- | --- | --- | --- | --- | --- | --- | --- | --- | --- | --- | --- | --- | --- | --- | --- | --- | --- | --- | --- | --- | --- | --- | --- | --- | --- | --- | --- | --- | --- | --- | --- | --- | --- | --- | --- | --- | --- | --- | --- | --- | --- | --- | --- | --- | --- | --- | --- | --- | --- | --- | --- | --- | --- | --- | --- | --- | --- | --- | --- | --- | --- | --- | --- | --- | --- | --- | --- | --- | --- | --- | --- | --- | --- | --- | --- | --- | --- | --- | --- | --- | --- | --- | --- | --- | --- | --- | --- | --- | --- | --- | --- | --- | --- | --- | --- | --- | --- | --- | --- | --- | --- | --- | --- | --- | --- | --- | --- | --- | --- | --- | --- | --- | --- | --- | --- | --- | --- | --- | --- | --- | --- | --- | --- | --- | --- | --- | --- | --- | --- | --- | --- | --- | --- | --- | --- | --- | --- | --- | --- | --- | --- | --- | --- | --- | --- | --- | --- | --- | --- | --- | --- | --- | --- | --- | --- | --- | --- | --- | --- |
